# Supplementary material for: Total synthesis of (±)-galanthamine from GABA through regioselective aryne insertion
Source: Royal Society of Chemistry journal article supplement (doi:10.1039/c8ob03123a), 2019-01-01
Supplement: c8ob03123a1.pdf [file c8ob03123a1.pdf]

## Supporting Information

### Total Synthesis of (±)-Galanthamine from GABA through Regioselective Aryne Insertion

Telugu Venkatesh,<sup>a,b</sup> Prathama S. Mainkar,<sup>a,b</sup> and Srivari Chandrasekhar<sup>\*,a,b</sup>

<sup>a</sup>*Department of Organic Synthesis & Process Chemistry, CSIR-Indian Institute of Chemical Technology,  
Hyderabad 500007, India*

<sup>b</sup>*Academy of Scientific & Innovative Research (AcSIR), New Delhi 110020, India*

Email: [srivaric@iict.res.in](mailto:srivaric@iict.res.in)

|                                                                                       | <b>Pages</b> |
|---------------------------------------------------------------------------------------|--------------|
| 1. <sup>1</sup> H & <sup>13</sup> C NMR spectra                                       | S-2 to S-13  |
| 2. Comparison of <sup>1</sup> H and <sup>13</sup> C NMR spectral data of Galanthamine | S-14         |

### 3. <sup>1</sup>H & <sup>13</sup>C NMR spectra:

#### Methyl 4-(((benzyloxy)carbonyl)(4-methoxybenzyl)amino)butanoate (7):

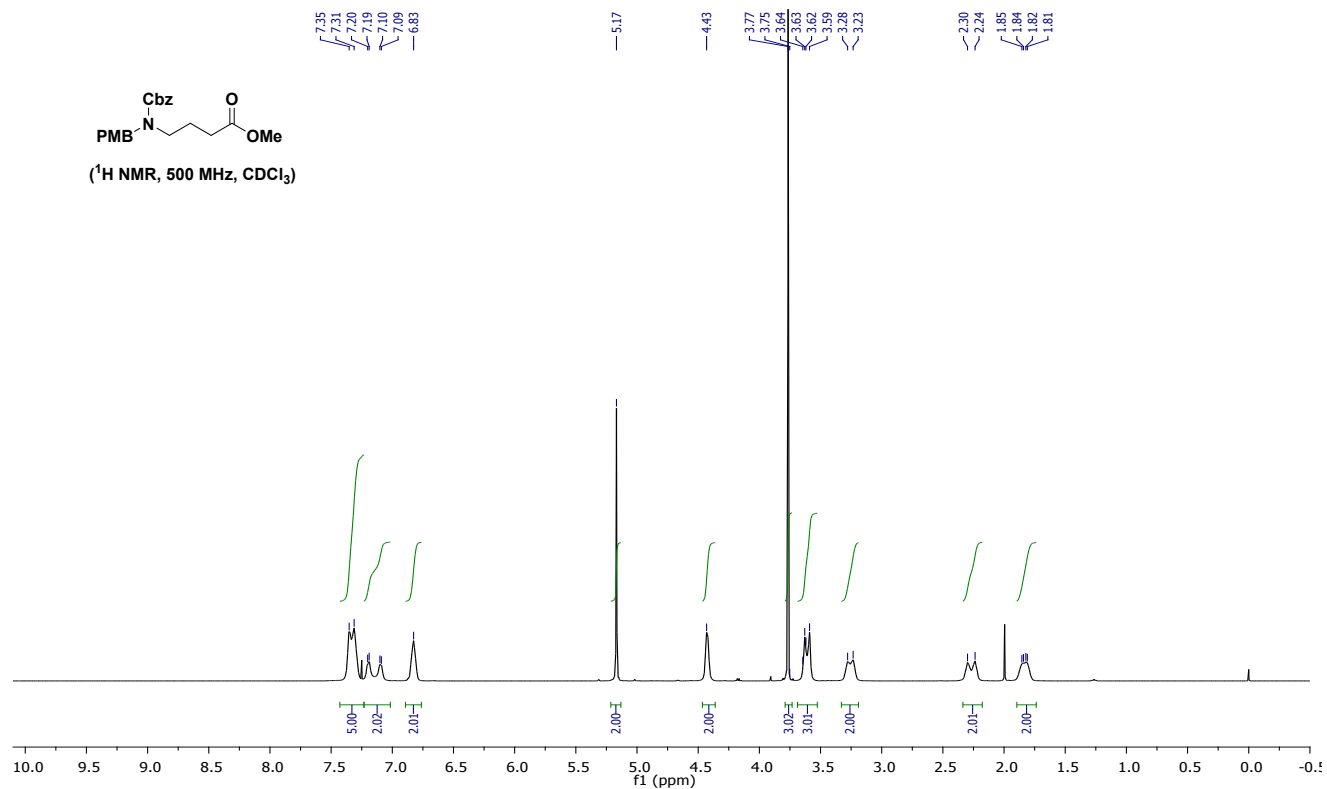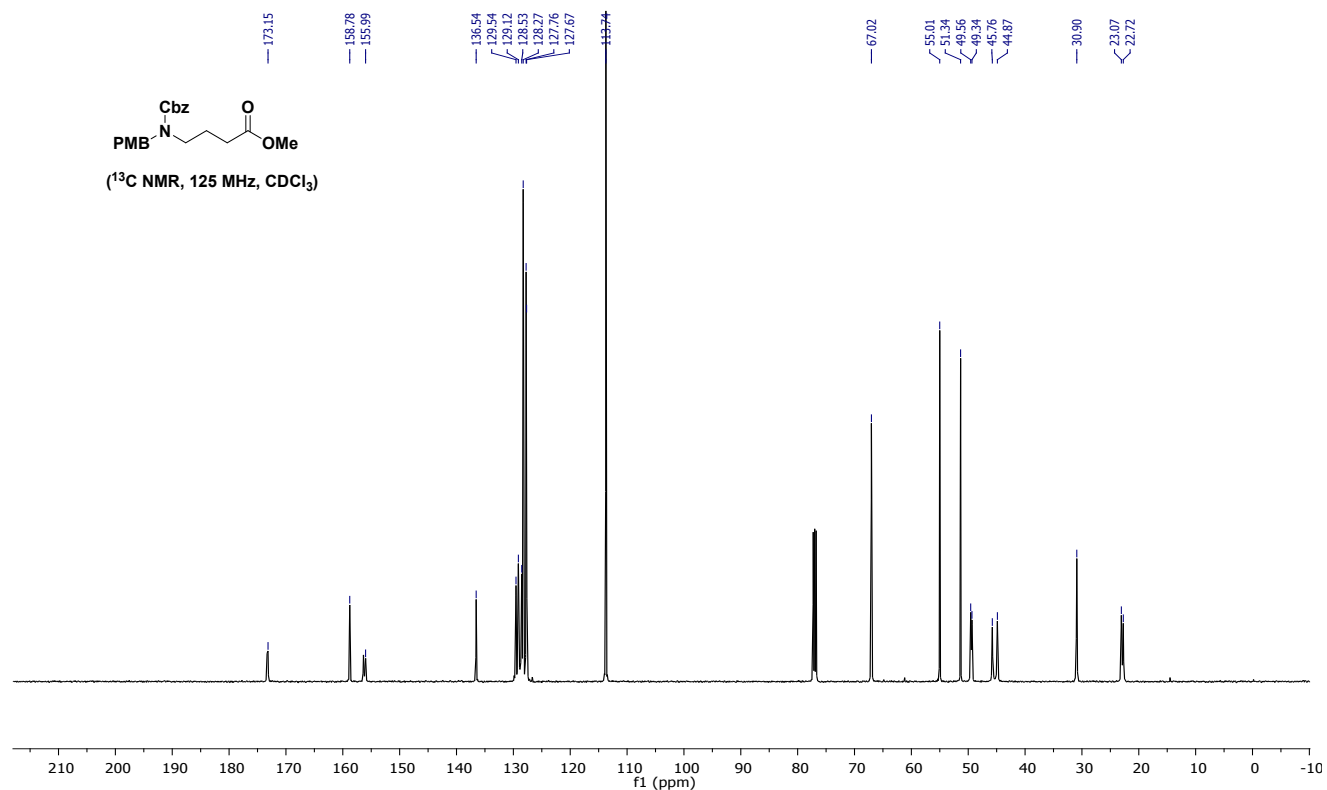

**Methyl 4-(((benzyloxy)carbonyl)(4-methoxybenzyl)amino)-2-formylbutanoate (5):**

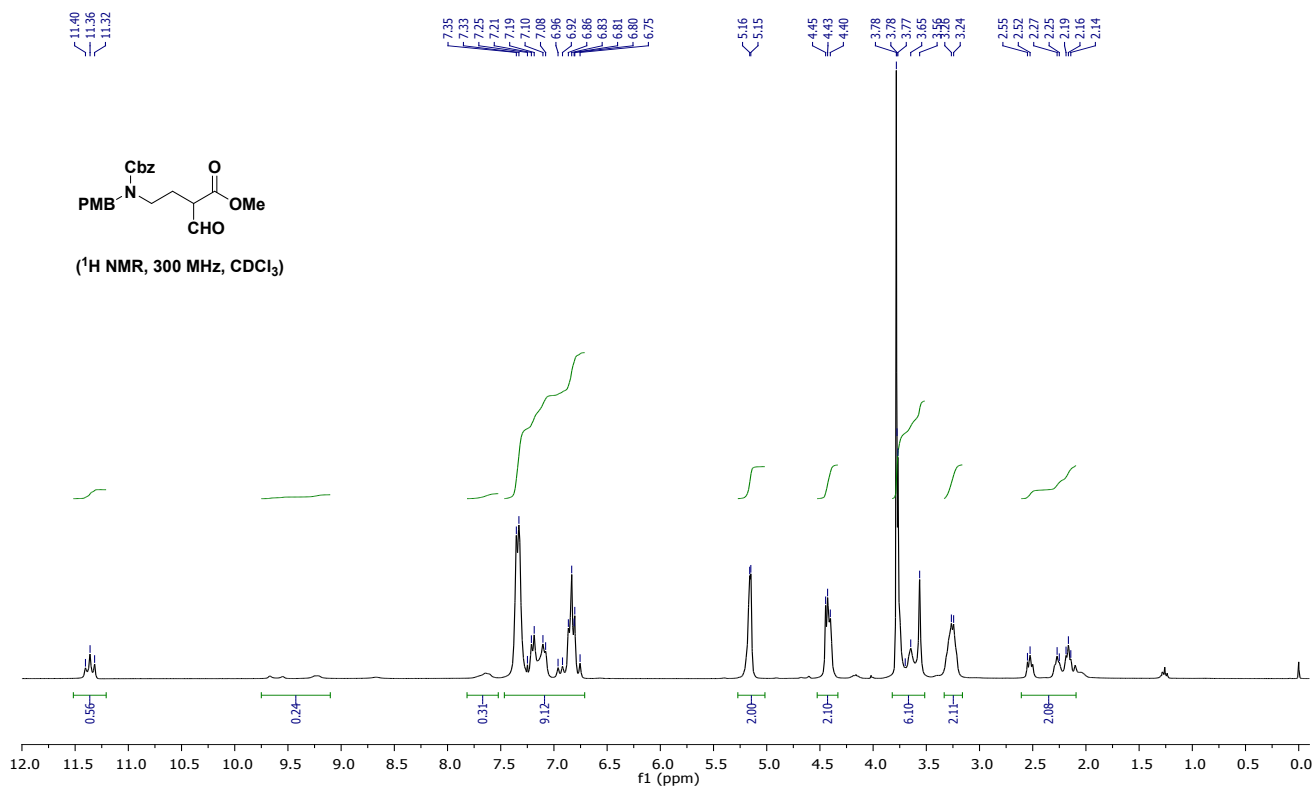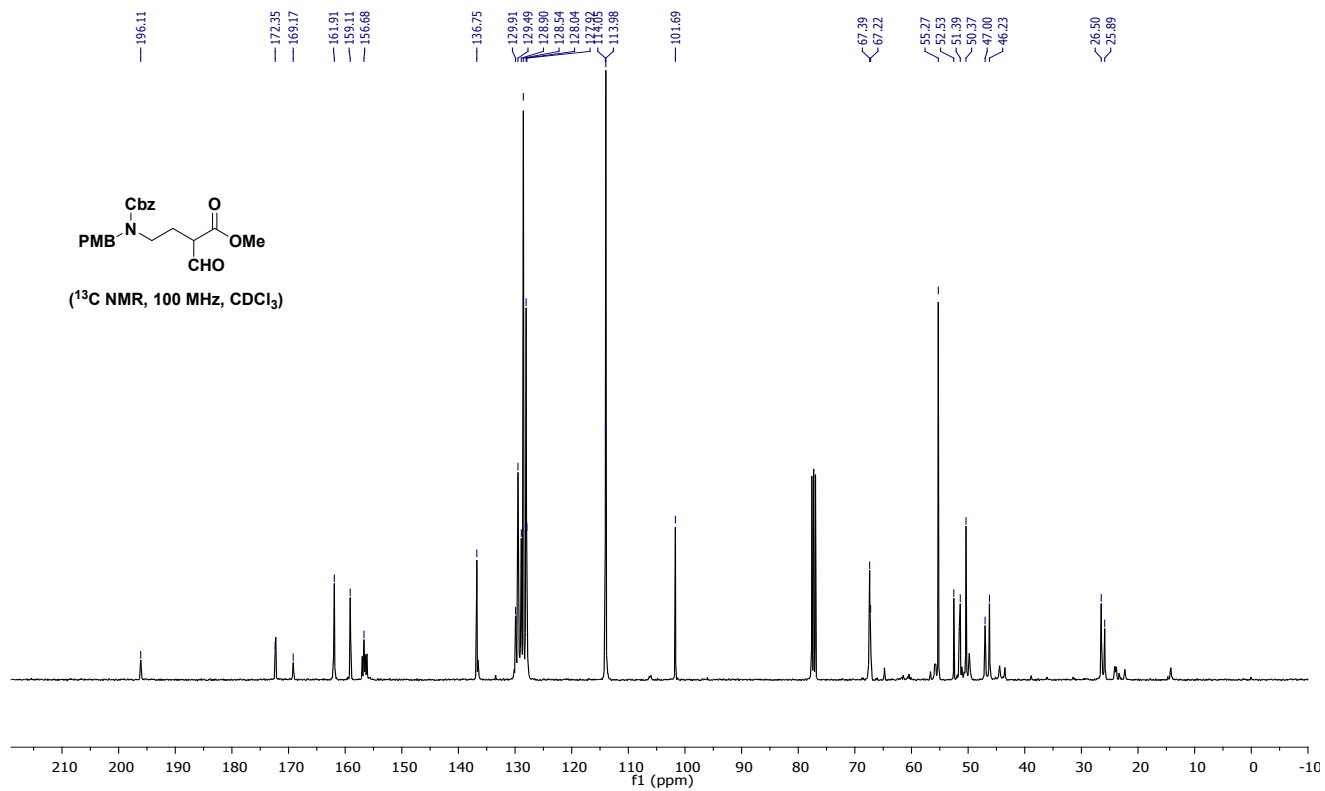

**Methyl 4-(((benzyloxy)carbonyl)(4-methoxybenzyl)amino)-2-(2-formyl-3-methoxyphenyl)butanoate (3):**

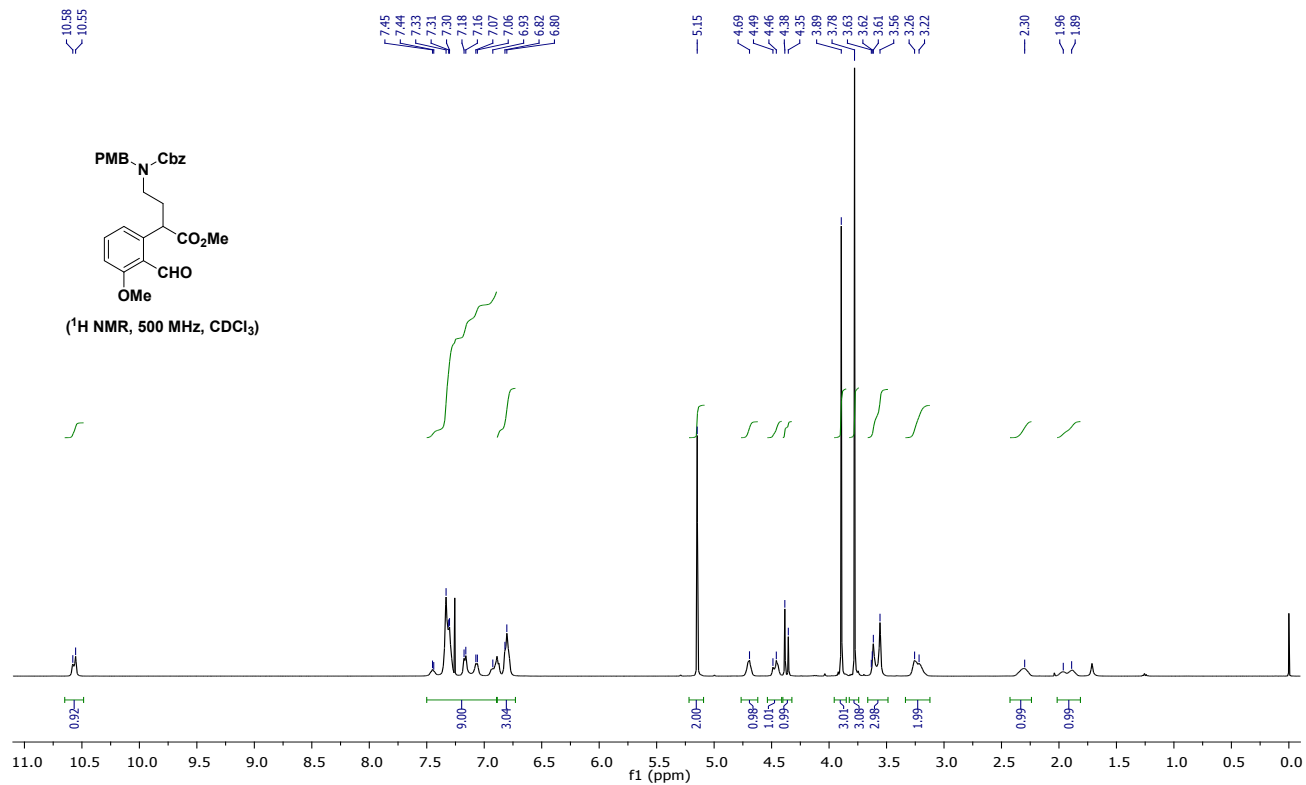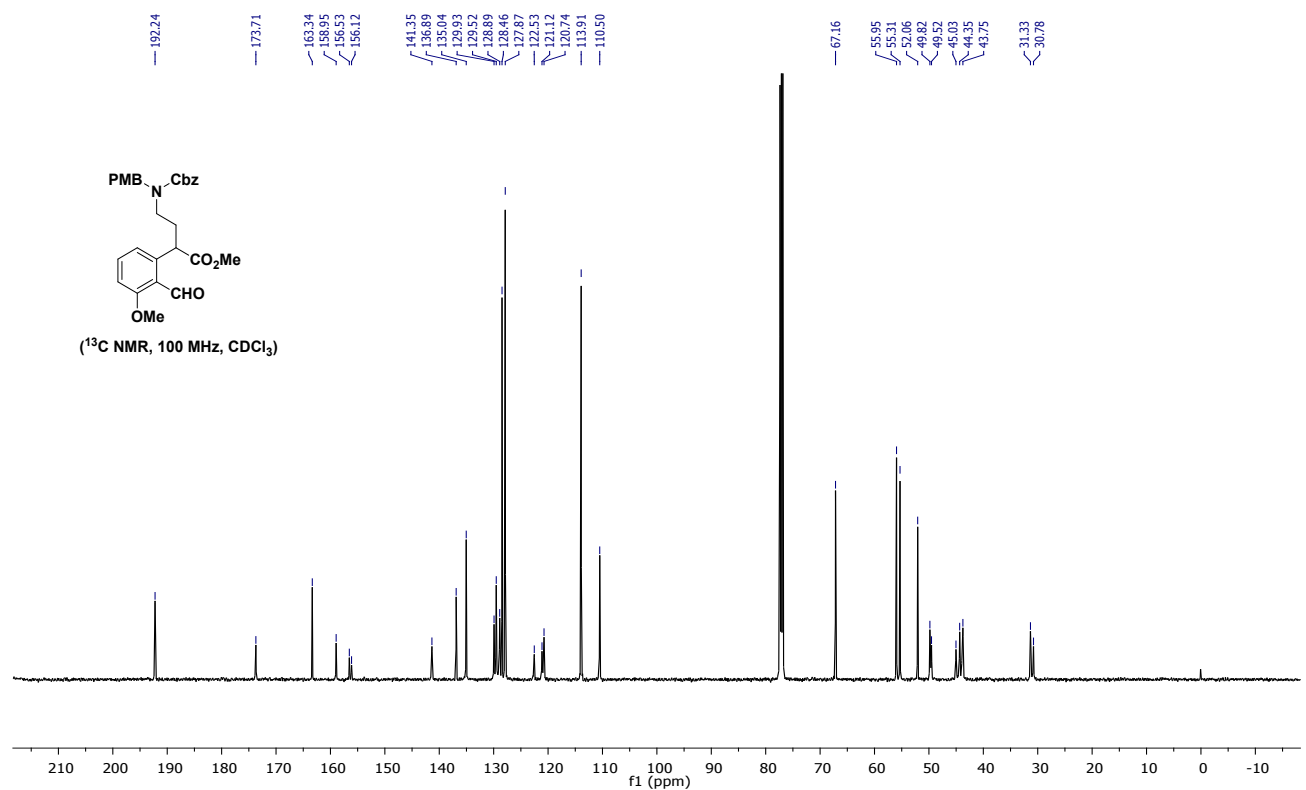

**Methyl 4-(((benzyloxy)carbonyl)(4-methoxybenzyl)amino)-2-(2-(formyloxy)-3-methoxyphenyl)butanoate (8):**

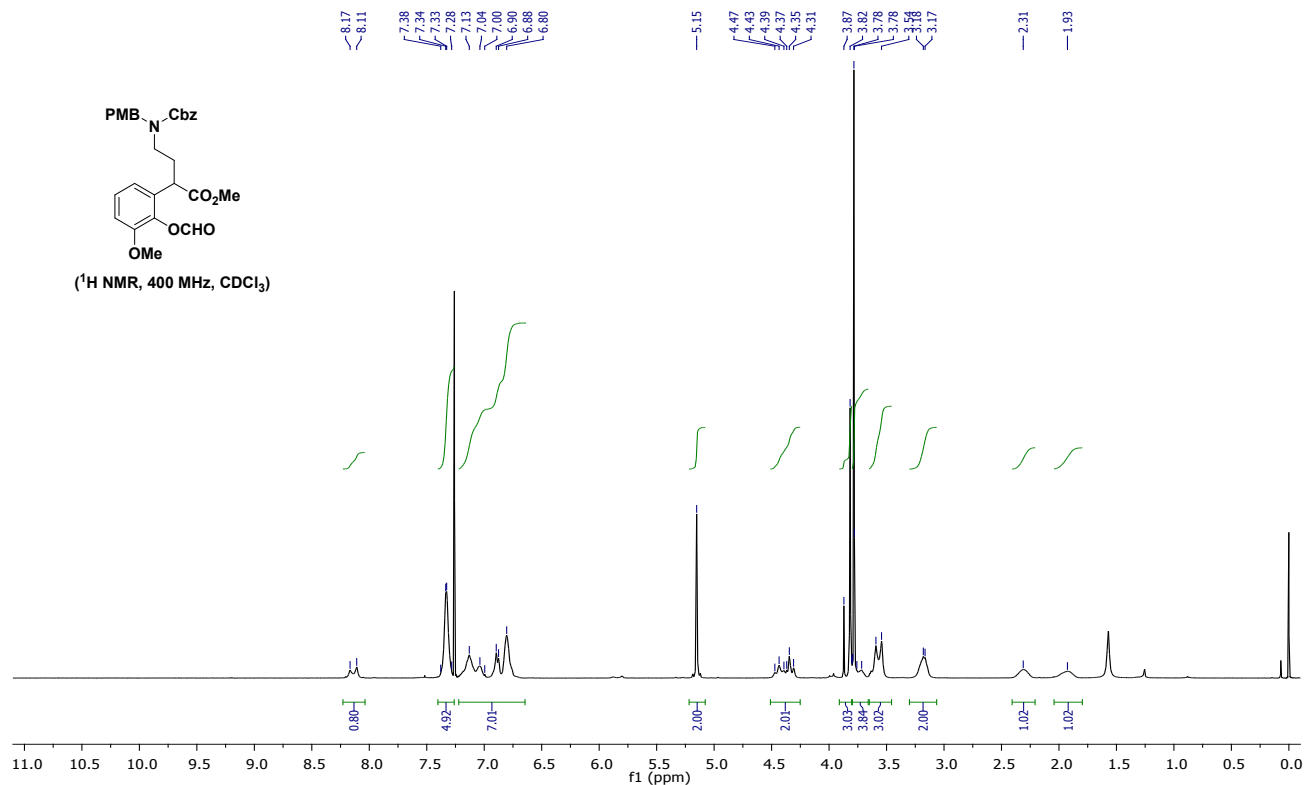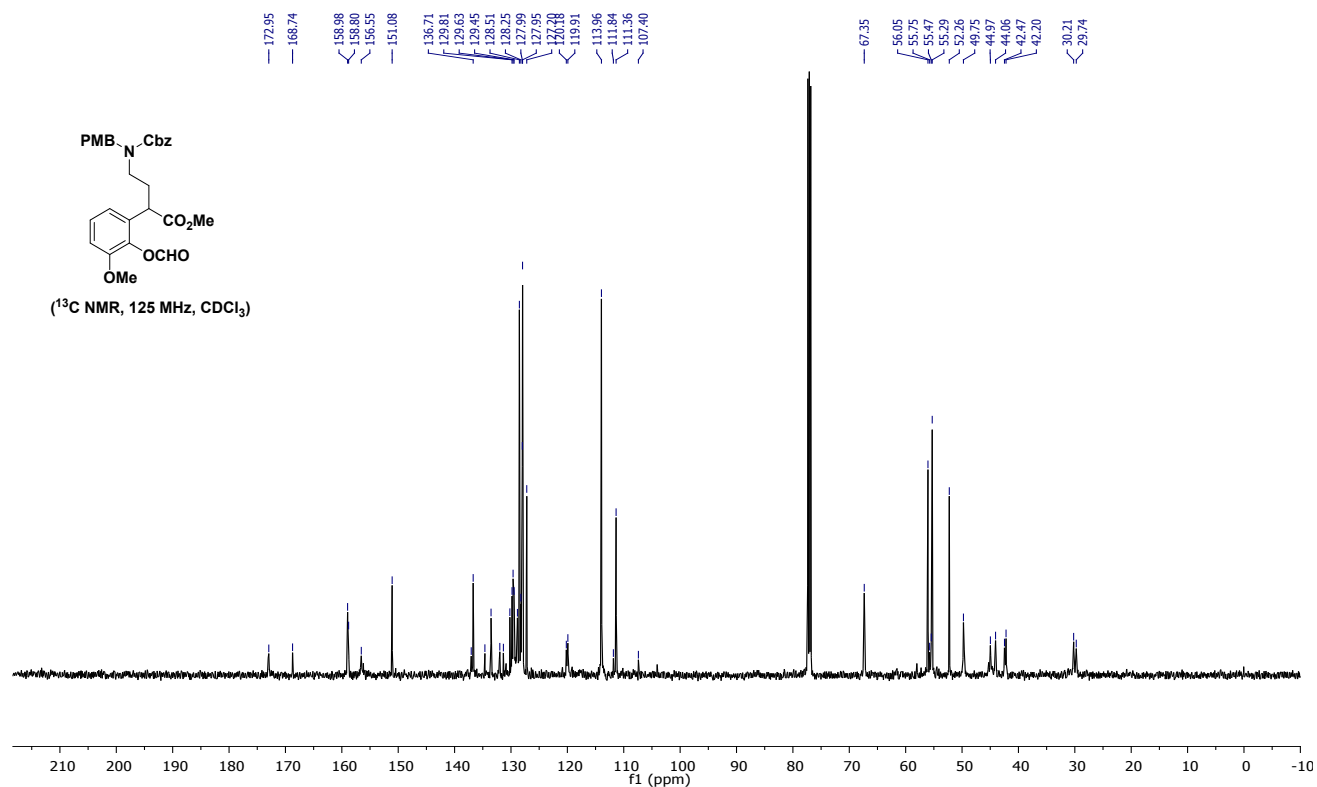

**Benzyl (2-(7-methoxy-2-oxo-2,3-dihydrobenzofuran-3-yl)ethyl)(4-methoxybenzyl)carbamate (9):**

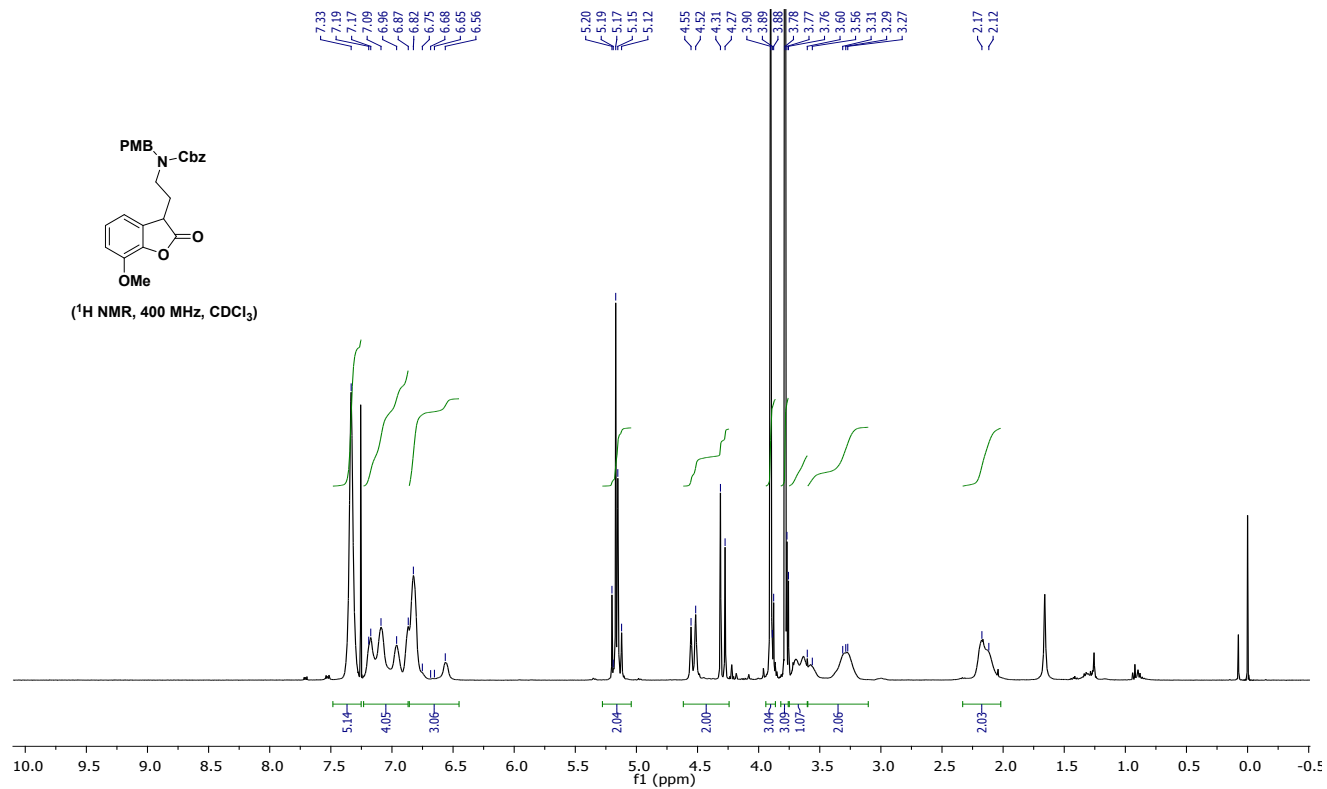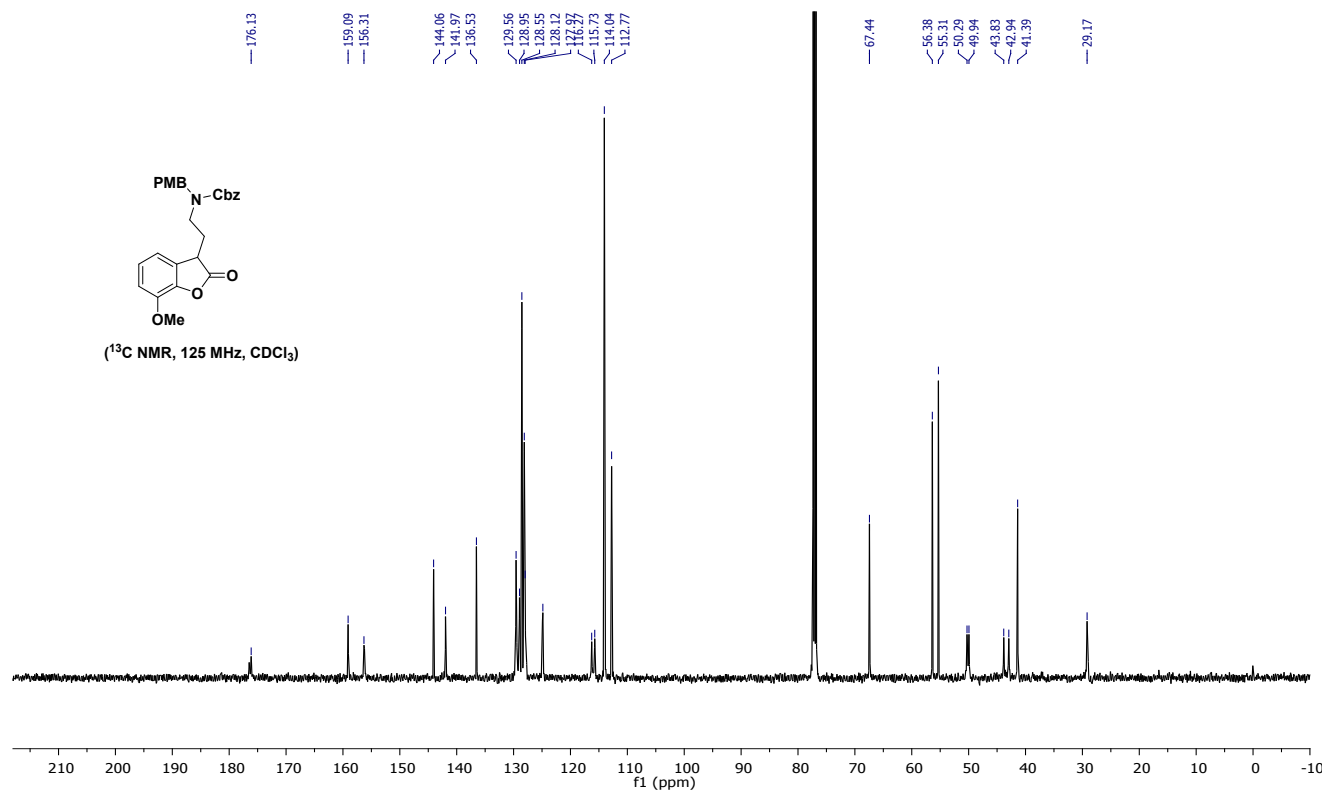

**Benzyl (2-(7-methoxy-2-oxo-3-(3-oxobutyl)-2,3-dihydrobenzofuran-3-yl)ethyl)(4-methoxybenzyl)carbamate (2):**

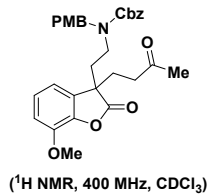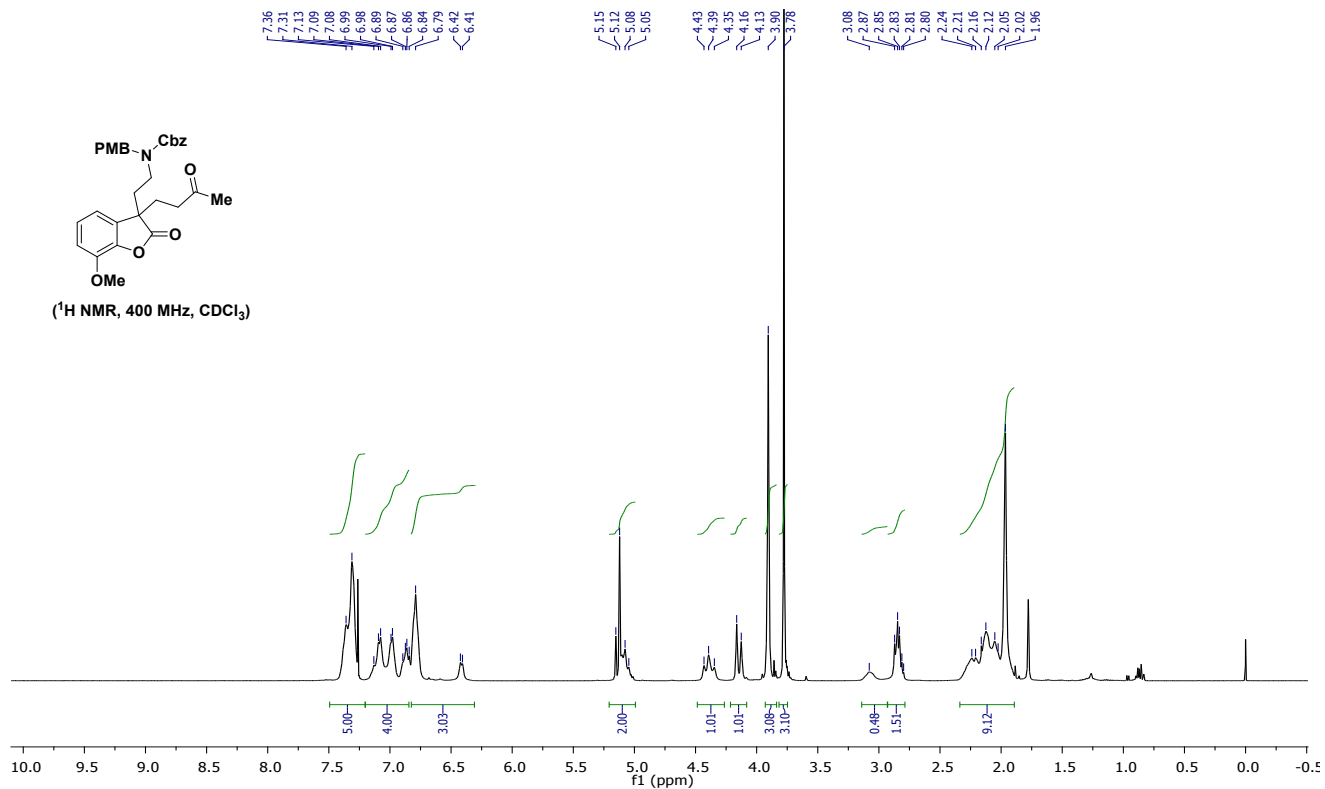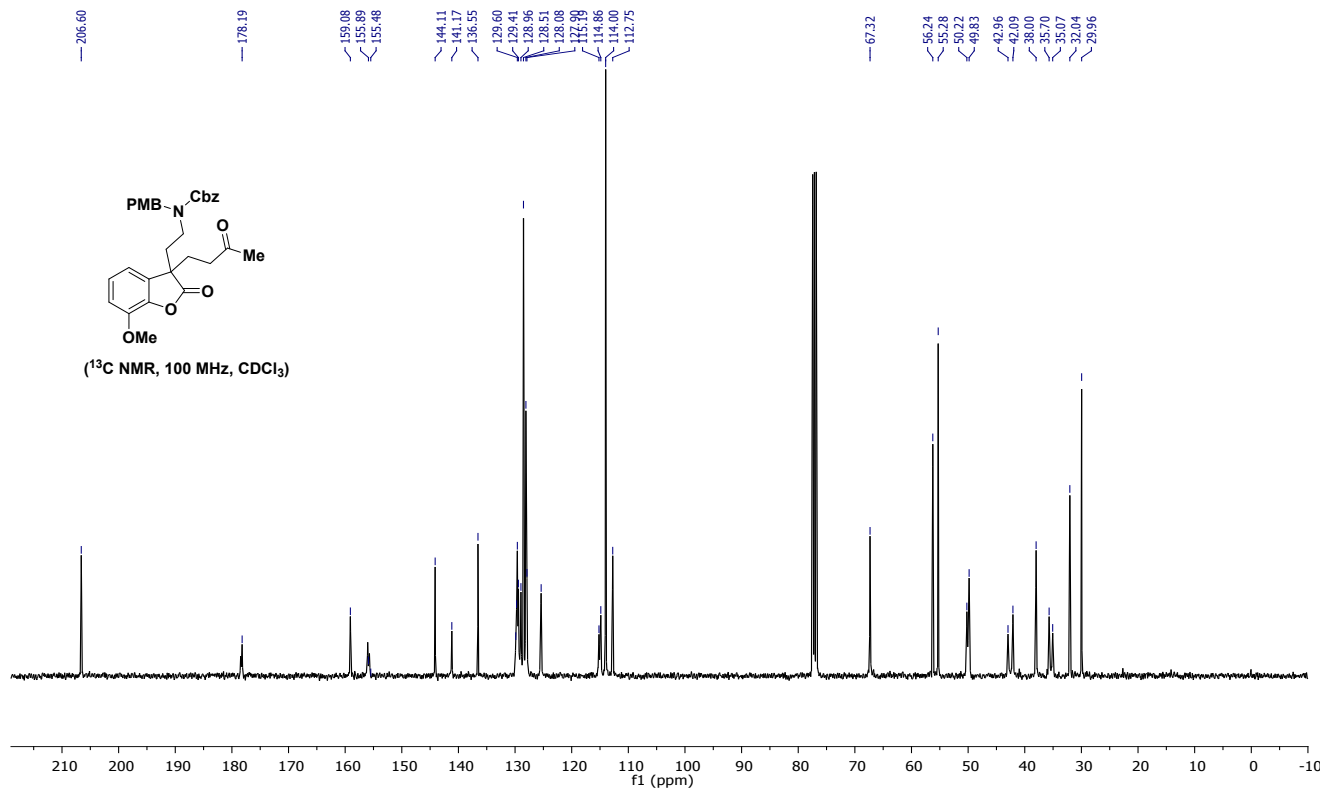

**Benzyl (2-(7-methoxy-2-oxo-3-(3-oxobutyl)-2,3-dihydrobenzofuran-3-yl)ethyl)carbamate (10):**

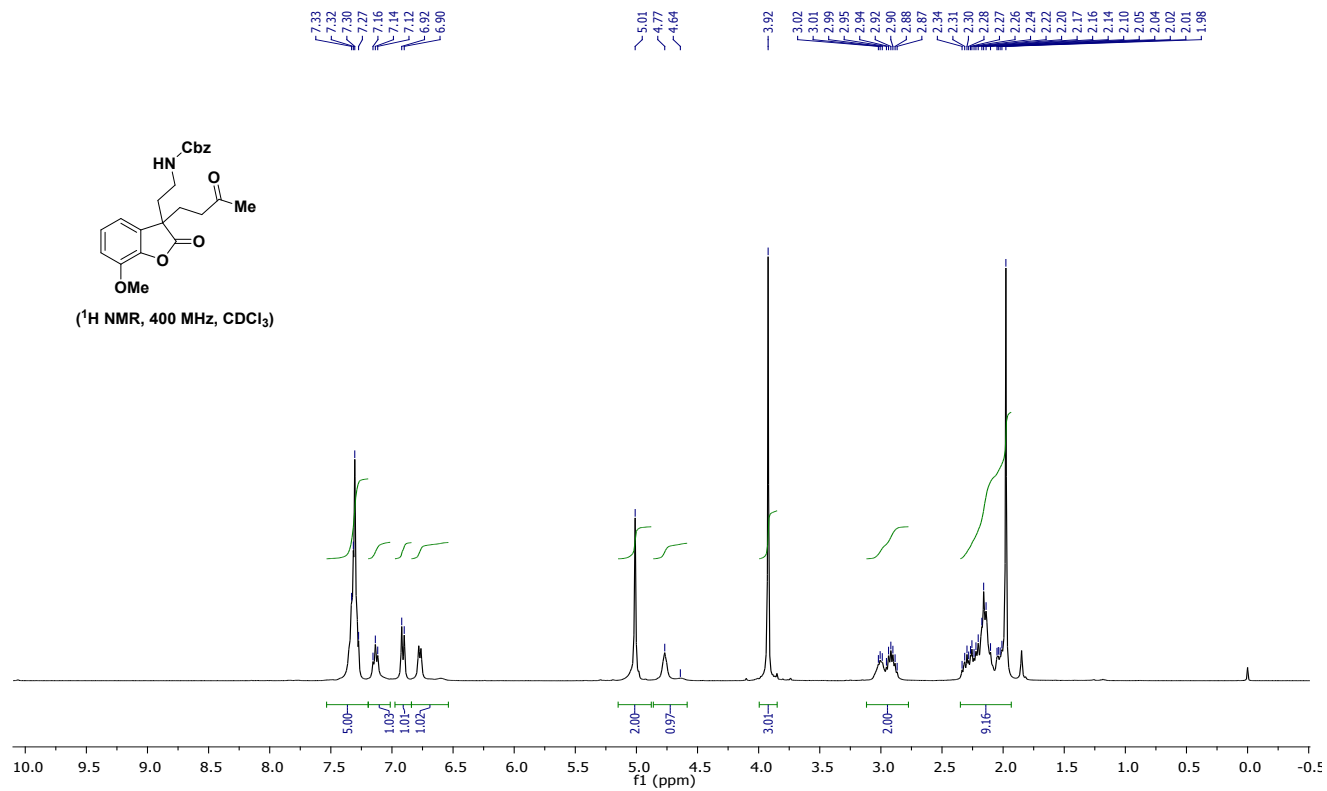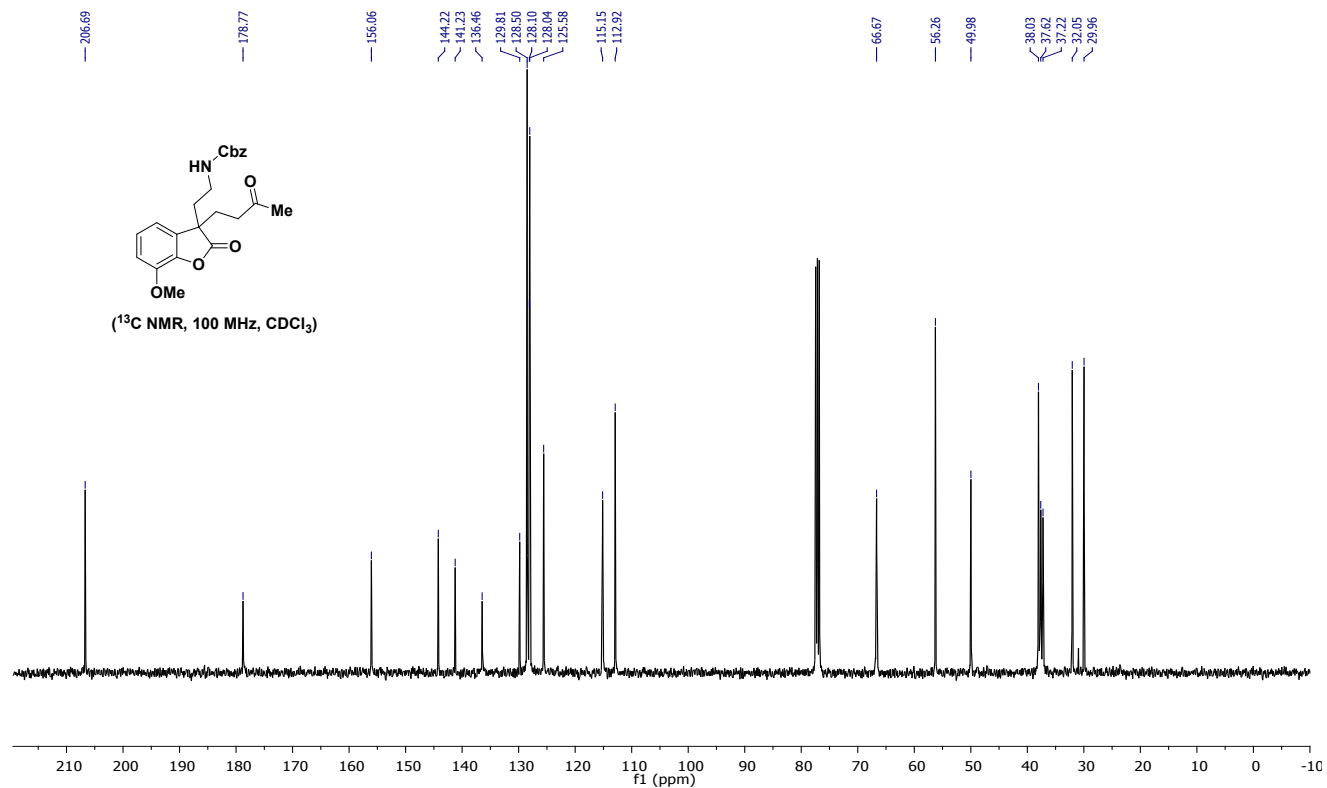



**Benzyl 7-methoxy-5-oxo-4a-(3-oxobutyl)-3,4,4a,5-tetrahydrobenzofuro[4,3-cd]azepine-2(1-H)-carboxylate (11):**

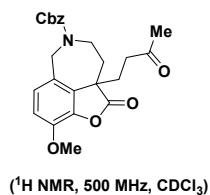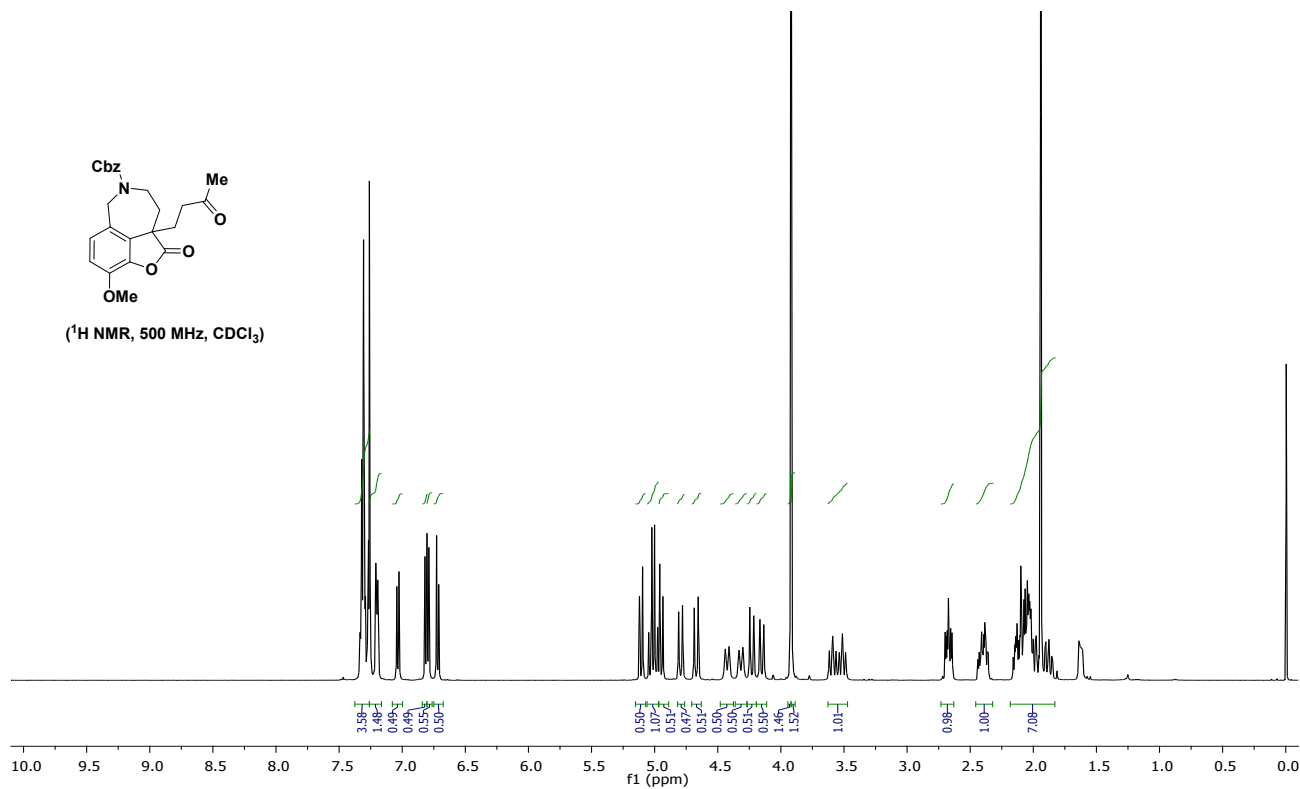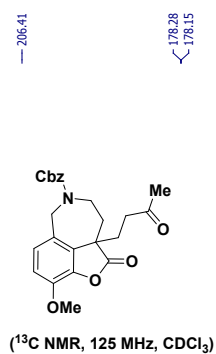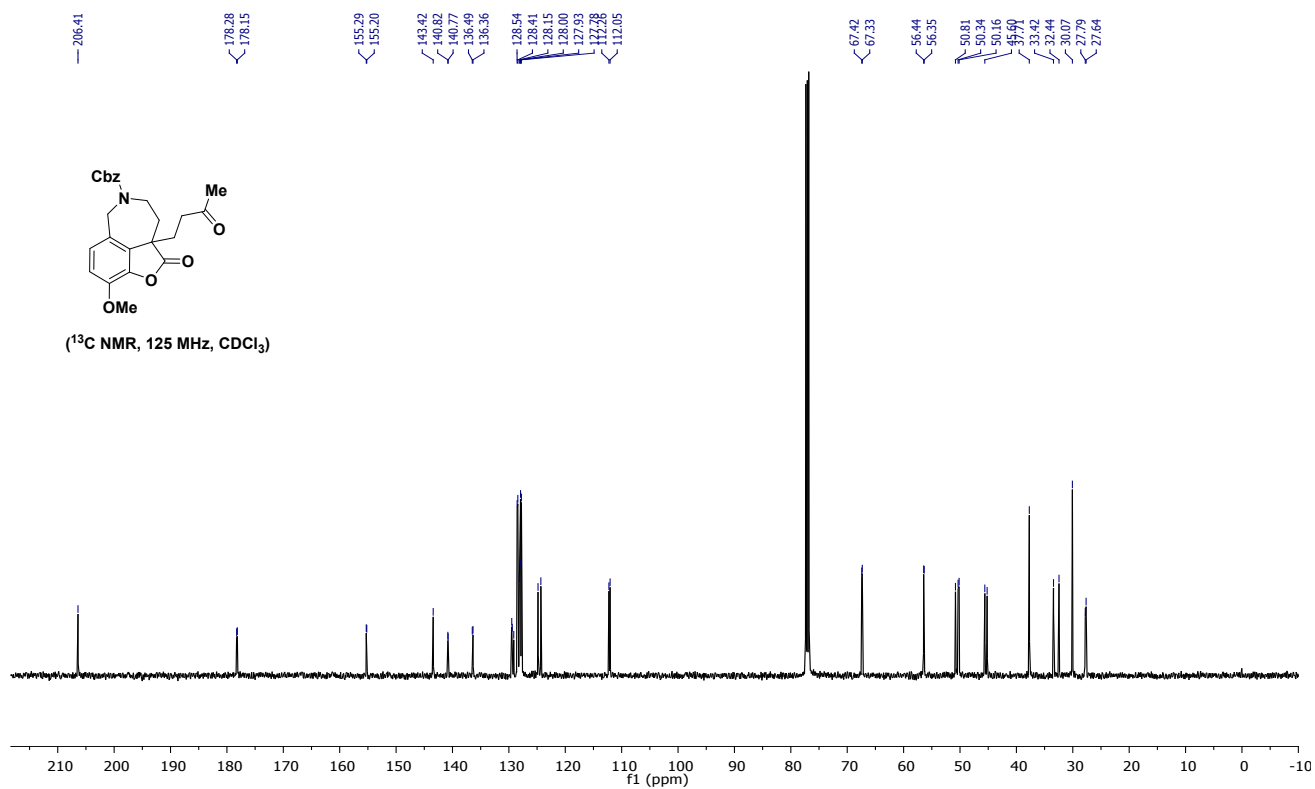

**Benzyl 7-methoxy-5-oxo-4a-(3-oxobutyl)-3,4,4a,5-tetrahydrobenzofuro[4,3-*cd*]azepine-2(1*H*)-carboxylate (12):**

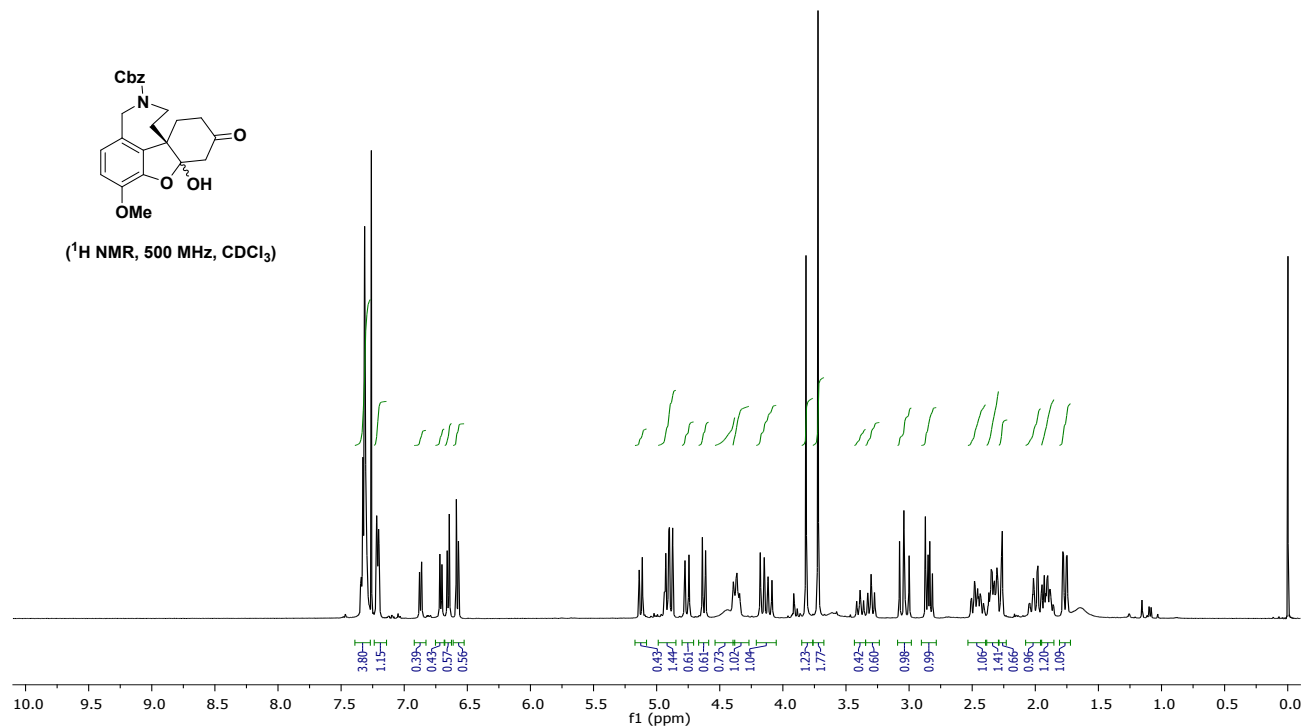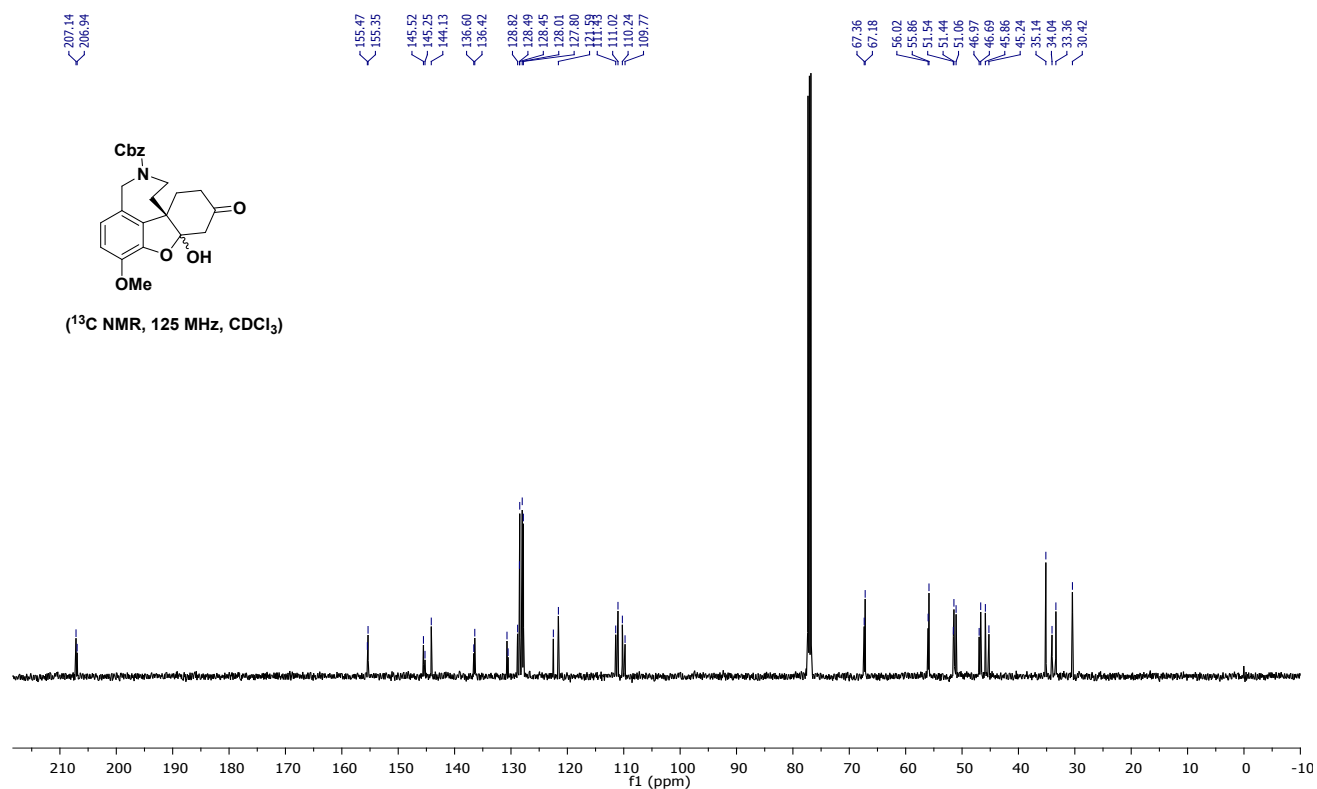

**(4*aS*,8*aR*)-3-Methoxy-11-methyl-4*a*,5,7,8,9,10,11,12-octahydro-6*H*-benzo[2,3]benzofuro-[4,3-*cd*]azepin-6-one (14):**

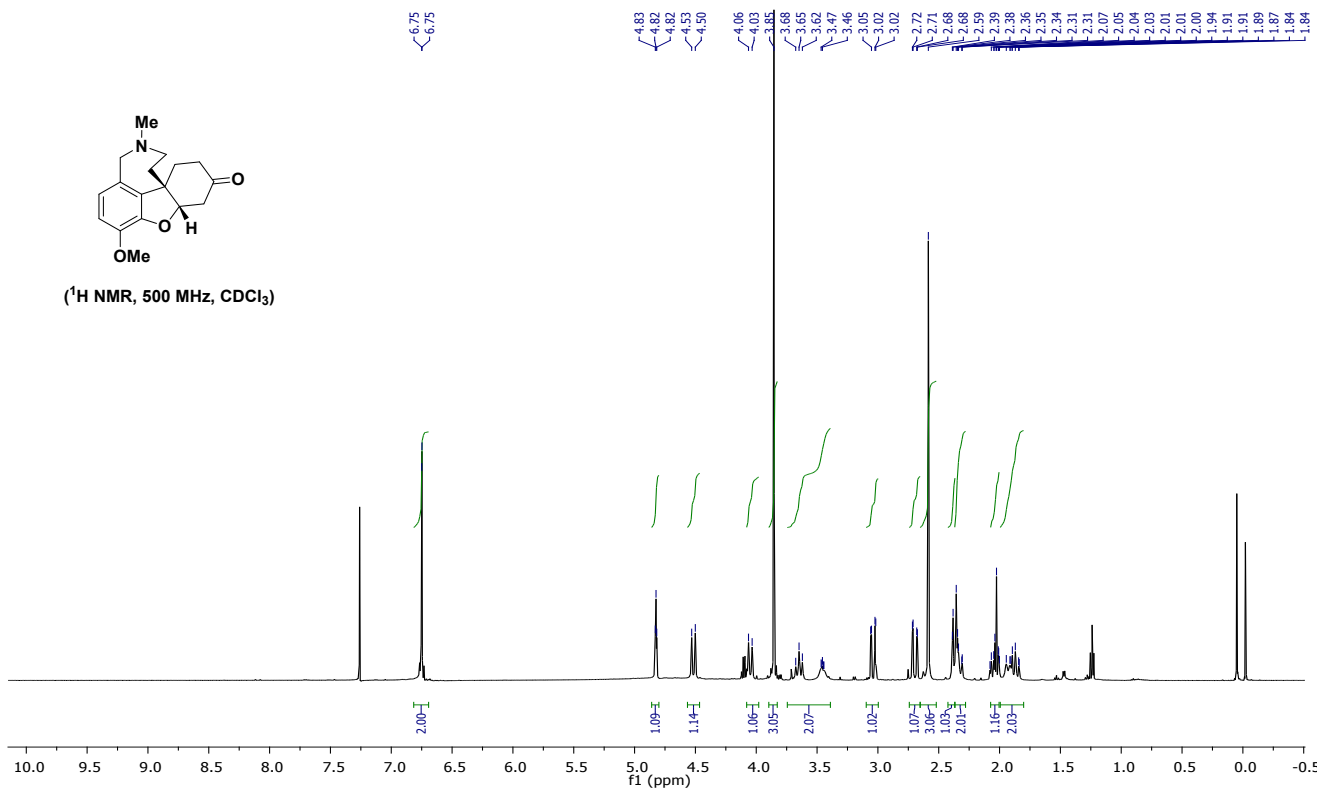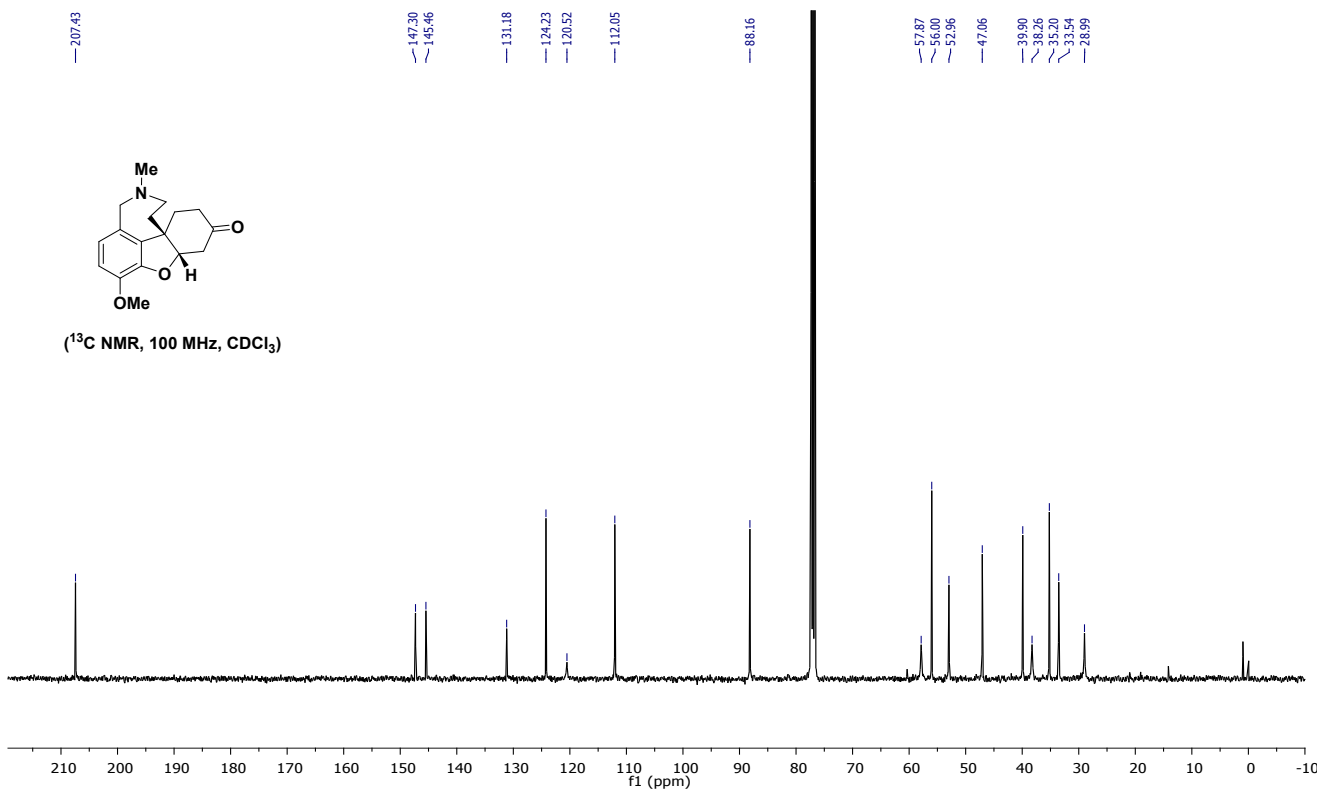

**(4a*S*,8a*S*)-3-Methoxy-11-methyl-4a,5,9,10,11,12-hexahydro-6*H*-benzo[2,3]benzofuro[4,3-*cd*]azepin-6-one (or) Narwedine (15):**

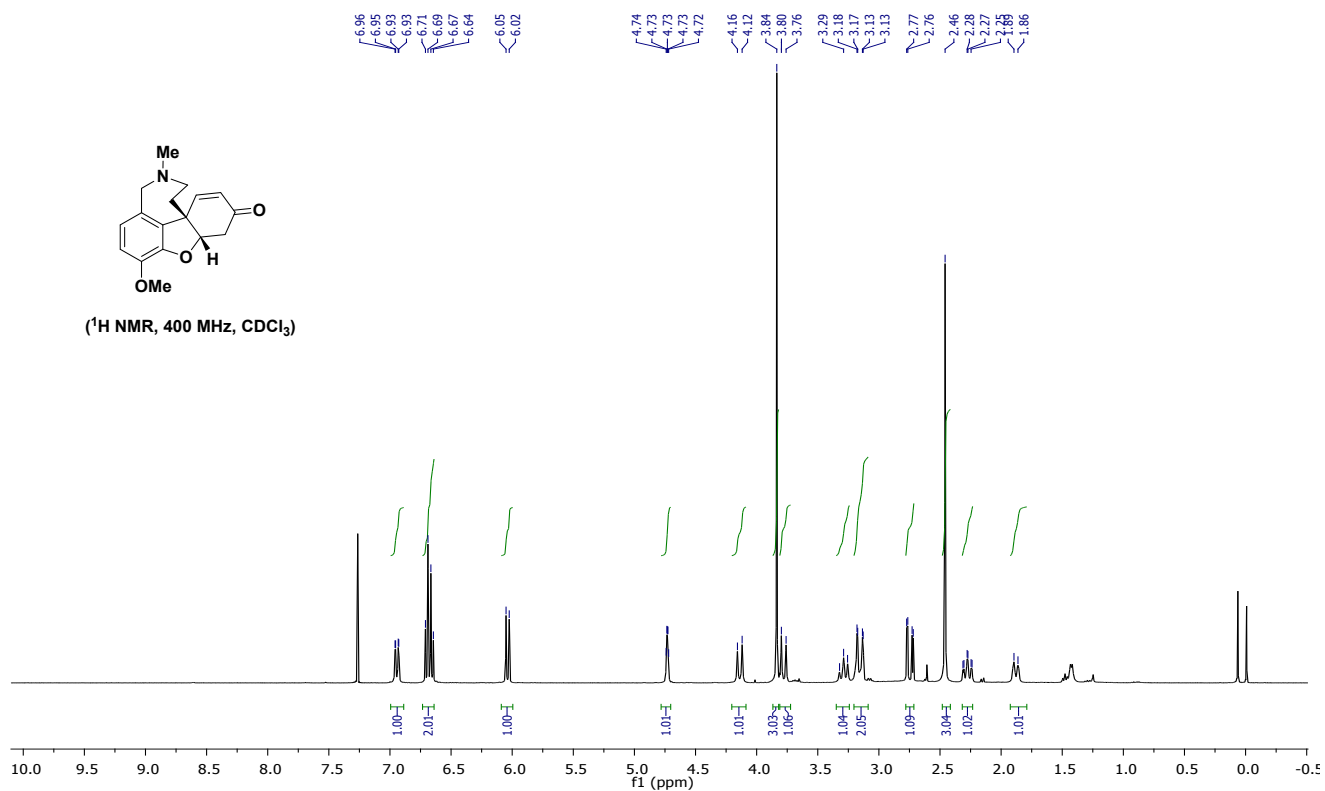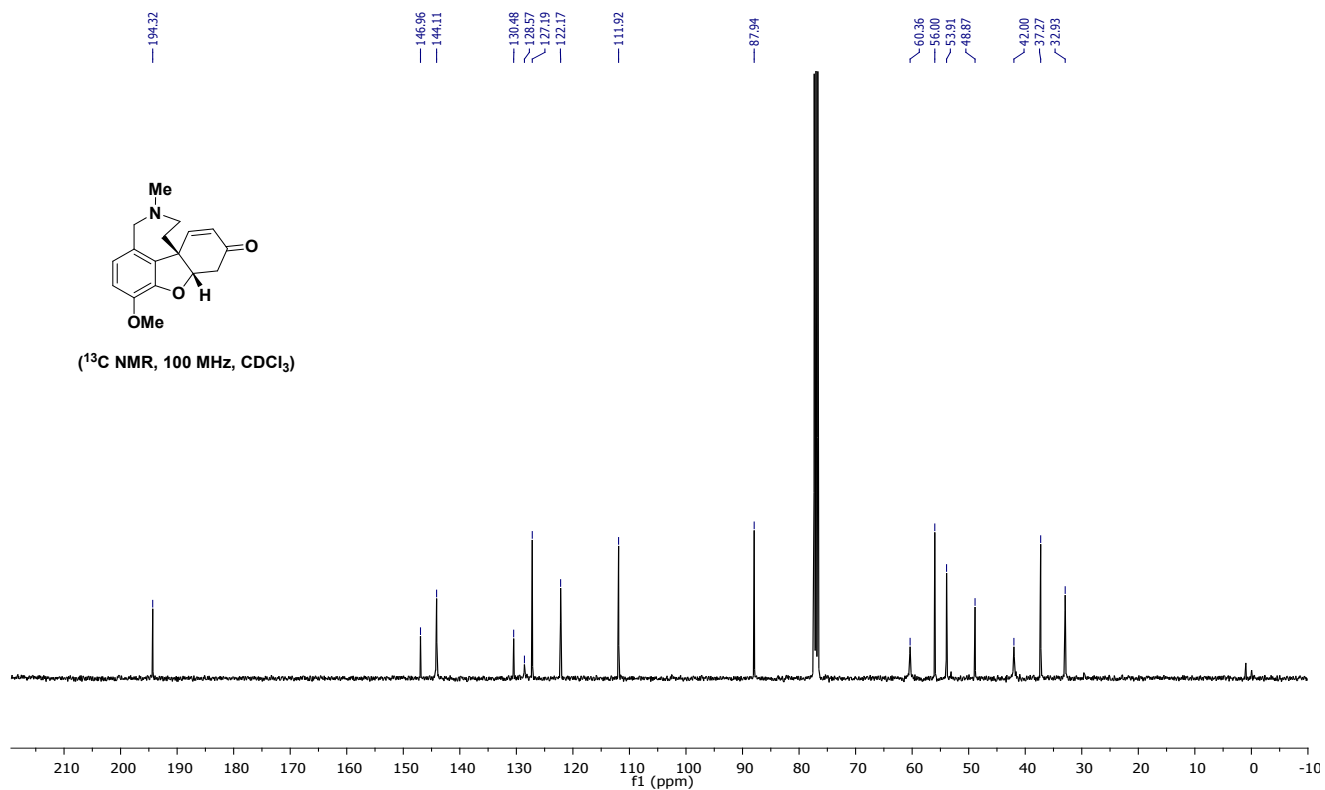

**(±)-Galanthamine (1):**

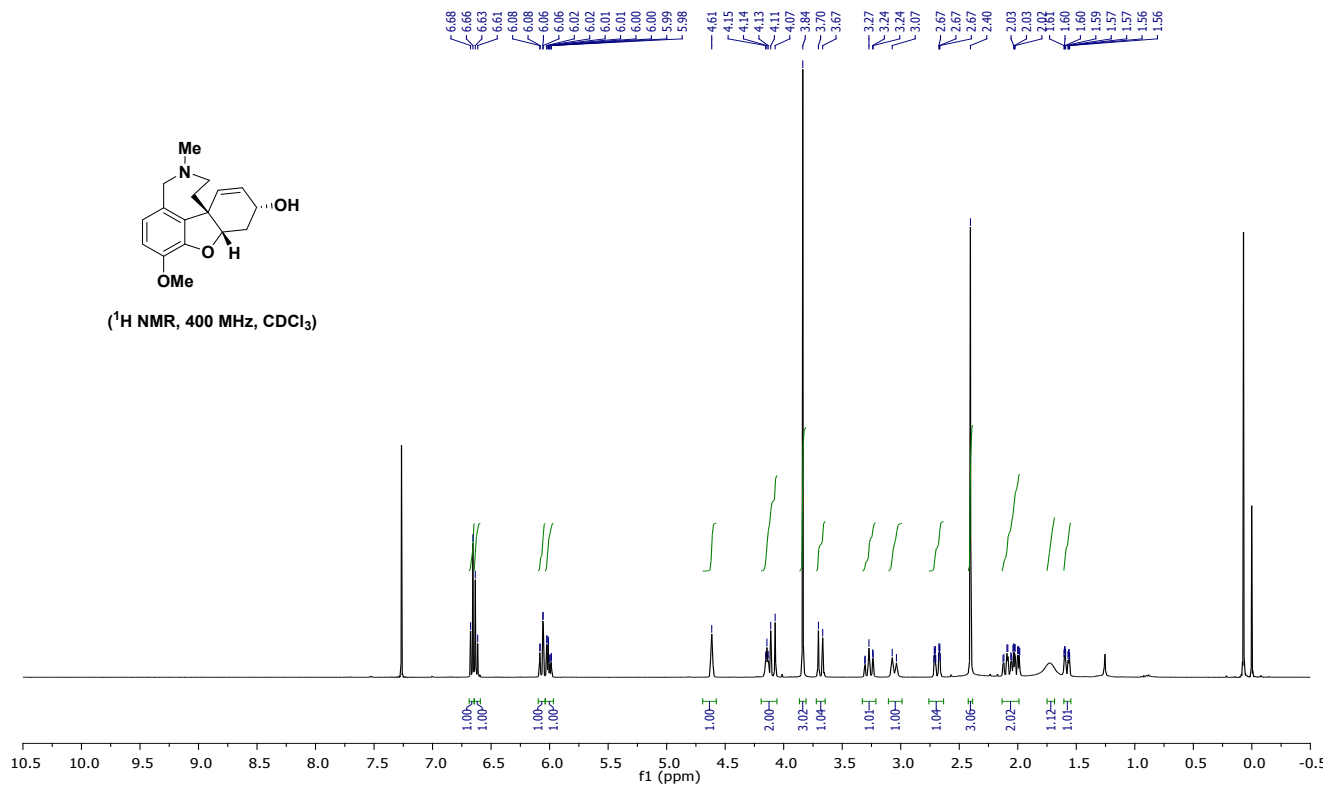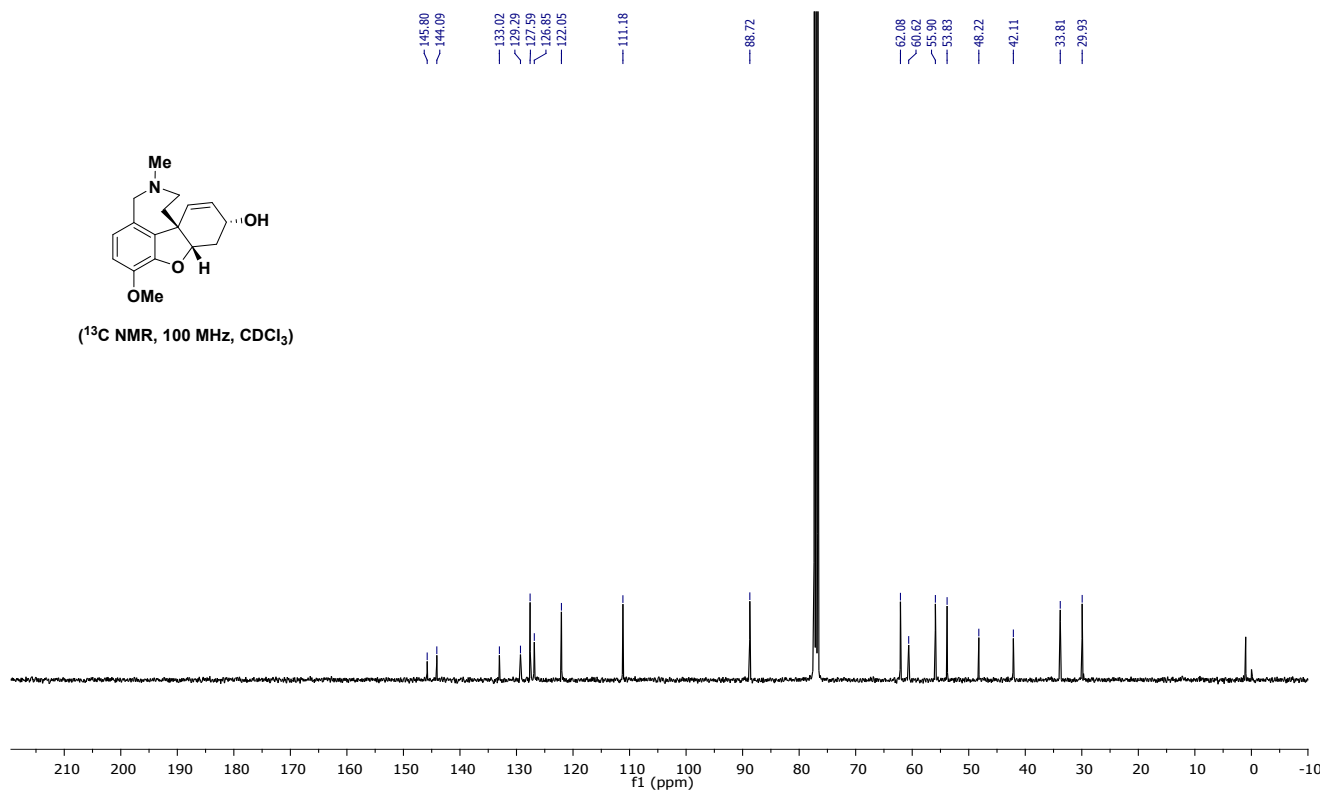

## 2. Comparison of $^1\text{H}$ and $^{13}\text{C}$ NMR spectral data of Galanthamine:

| Reported                                                                                    |                 | Synthetic                               |                 |
|---------------------------------------------------------------------------------------------|-----------------|-----------------------------------------|-----------------|
| $^1\text{H}$                                                                                | $^{13}\text{C}$ | $^1\text{H}$                            | $^{13}\text{C}$ |
| 6.64 (d, $J = 8.3$ Hz, 1H)                                                                  | 145.7           | 6.67 (d, $J = 8.2$ Hz, 1H)              | 145.8           |
| 6.60 (d, $J = 8.3$ Hz, 1H)                                                                  | 144.1           | 6.62 (d, $J = 8.2$ Hz, 1H)              | 144.0           |
| 6.04 (d, $J = 10.2$ Hz, 1H)                                                                 | 133.0           | 6.07 (dd, $J = 10.3, 1.1$ Hz, 1H)       | 133.0           |
| 5.98 (ddd, $J = 10.2, 5.1, 1.0$ Hz, 1H)                                                     | 129.3           | 6.00 (ddd, $J = 10.2, 4.9, 1.0$ Hz, 1H) | 129.2           |
| 4.59 (s, 1H)                                                                                | 127.6           | 4.61 (s, 1H)                            | 127.5           |
| 4.12 (br s, 1H), 4.07 (d, $J = 15.1$ Hz, 1H)                                                | 126.8           | 4.19 – 4.06 (m, 2H)                     | 126.8           |
| 3.81 (s, 3H)                                                                                | 122.0           | 3.84 (s, 3H)                            | 122.0           |
| 3.66 (d, $J = 15.1$ Hz, 1H)                                                                 | 111.1           | 3.68 (d, $J = 14.6$ Hz, 1H)             | 111.1           |
| 3.25 (t, $J = 13.0$ Hz, 1H)                                                                 | 88.7            | 3.33 – 3.21 (m, 1H)                     | 88.7            |
| 3.03 (br d, $J = 13.9$ Hz, 1H)                                                              | 62.1            | 3.05 (d, $J = 14.4$ Hz, 1H)             | 62.0            |
| 2.67 (ddt, $J = 15.9, 3.7, 1.2$ Hz, 1H)                                                     | 60.6, 55.9      | 2.69 (ddt, $J = 15.7, 3.1, 1.4$ Hz, 1H) | 60.6, 55.9      |
| 2.38 (s, 3H)                                                                                | 53.8, 48.2      | 2.40 (s, 3H)                            | 53.8, 48.2      |
| 2.06 (td, $J = 13.2, 2.0$ Hz, 1H), 1.98 (ddd, $J = 15.9, 5.1, 2.4$ Hz, 1H), 1.67 (br s, 1H) | 42.1, 33.8      | 2.13 – 1.99 (m, 2H), 1.71 (br s, 1H)    | 42.1, 33.8      |
| 1.55 (ddd, $J = 13.6, 3.6, 1.1$ Hz, 1H)                                                     | 29.9            | 1.58 (ddd, $J = 13.7, 3.9, 1.7$ Hz, 1H) | 29.9            |

Reference: B. M. Trost and F. D. Toste, *J. Am. Chem. Soc.* 2000, **122**, 11262-11263.
